# Supplementary material for: Two Nested Inversions in the X Chromosome Differentiate the Dominant Malaria Vectors in Europe, Anopheles atroparvus and Anopheles messeae
Source: Insects. 2024 Apr 26;15(5):312. doi: 10.3390/insects15050312 (PMC11122324; doi:10.3390/insects15050312)
Supplement: Supplementary file 1 [file insects-15-00312-s001.zip]

Archive with 26 entries (26 files):
- fig S1.tif
- __MACOSX/._fig S1.tif
- fig S2.tif
- __MACOSX/._fig S2.tif
- fig S3.tif
- __MACOSX/._fig S3.tif
- fig S4.tif
- __MACOSX/._fig S4.tif
- fig S5.tif
- __MACOSX/._fig S5.tif
- fig S6.tif
- __MACOSX/._fig S6.tif
- Supplementary figures with captures.pdf
- __MACOSX/._Supplementary figures with captures.pdf
- Table S1 - The An. atroparvus genes are used as markers for physical mapping of breakpoint regions of fixed rearrangements in the X chromosome of An. messeae..xlsx
- __MACOSX/._Table S1 - The An. atroparvus genes are used as markers for physical mapping of breakpoint regions of fixed rearrangements in the X chromosome of An. messeae..xlsx
- Table S2 - List of SB2 and SB4 genes.xlsx
- __MACOSX/._Table S2 - List of SB2 and SB4 genes.xlsx
- Table S3 - The coordinates of the BR-flanking gene markers in the An. atroparvus genome assembly..xlsx
- __MACOSX/._Table S3 - The coordinates of the BR-flanking gene markers in the An. atroparvus genome assembly..xlsx
- Table S4 - Enriched GO Biological Process term.xlsx
- __MACOSX/._Table S4 - Enriched GO Biological Process term.xlsx
- Table S5 - Enriched GO Molecular Function terms.xlsx
- __MACOSX/._Table S5 - Enriched GO Molecular Function terms.xlsx
- Table S6 - Enriched GO Cellular Component terms.xlsx
- __MACOSX/._Table S6 - Enriched GO Cellular Component terms.xlsx
