# Supplementary material for: Two Nested Inversions in the X Chromosome Differentiate the Dominant Malaria Vectors in Europe, Anopheles atroparvus and Anopheles messeae
Source: Insects. 2024 Apr 26;15(5):312. doi: 10.3390/insects15050312 (PMC11122324; doi:10.3390/insects15050312)
Supplement: Supplementary file 1 [file insects-15-00312-s001.zip › Table S1 - The An. atroparvus genes are used as markers for physical mapping of breakpoint regions of fixed rearrangements in the X chromosome of An. messeae..xlsx]

## Sheet: Tabel S1
Table S1: The An. atroparvus genes are used as markers for physical mapping of breakpoint regions of fixed rearrangements in the X chromosome of An. messeae.
	VectorBase gene name	Primers sequences (5’ -> 3’)	Genomic location in AatrE3 : start	Genomic location in AatrE3: end	An. atroparvus chromosome regions	An. messeae chromosome regions
1	AATE010696	gcgtaaagcacgttccaaat	AatrE3_X:18,023	22,191(+)	1A	1A
		gacgggaagcaacttctcag
2	AATE001169	tggaggacgttcggtttctg	AatrE3_X:1,162,806	1,170,169(+)	1A	1A
		aattccgactgctcgctagg
3	AATE008844	agttcgtgactcgtcaggtg	AatrE3_X:1,447,542	1,458,895(+)	1B	1B
		tgctgttgctgtcgttttcg
4	AATE011784	tgttttaacctcgctcgttg	AatrE3_X:1,463,880	1,465,754(+)	1B	Multiple
		ggtacttcgagtcgttgttg
5	AATE016042	ttgctcttaggttcggaatg	AatrE3_X:1,465,925	1,468,608(-)	1B	4B
		gggctatgttactgggtcta
6	AATE002683	tctcacttttcgttaagccc	AatrE3_X:1,474,565	1,477,429(-)	1B	4B
		cagctcgtggtagtagaaca
7	AATE009927	caggctaggcgtgaaaaat	AatrE3_X:1,503,333	1,512,052(+)	1B	4B
		catactggcgtcttatgcac
8	AATE012122	tgtgacgaactttaccggg	AatrE3_X:1,514,581	1,519,283(-)	1B	4B
		gcgcactgatgacgatga
9	AATE009073	acttcgatcgcgtcctc	AatrE3_X:1,564,139	1,566,618(+)	1B	4B
		cttcggcgacggagta
10	AATE013780	ccagtggacggagctaaatc	AatrE3_X:1,629,871	1,633,254(+)	1B	4B
		ggatggactgtatcggctgt
11	AATE017741	gcagctgttatgtgcttcgg	AatrE3_X:1,960,425	1,963,110(+)	1B	4B
		gtagtacacccagtagcgcc
12	AATE016081	tcgagtgccggtgatataag	AatrE3_X:1,978,577	1,981,869(+)	1B	4B
		agggagttatcacatgacgg
13	AATE020982	tgcatagtgaagacaccctc	AatrE3_X:1,983,088	1,985,780(+)	1B	4B
		agaccttagcatatcgccag
14	AATE016478	cctctcatcatgcggaaaaa	AatrE3_X:1,988,001	1,992,840(-)	1B	4B
		catacgacatgctggatcg
15	AATE020848	tcacaagcgtacgagtacat	AatrE3_X:1,999,834	2,001,318(+)	1B	1C
		cattgctcagtaaaccggag
16	AATE001684	acgggtgtgaactcctaatc	AatrE3_X:2,012,649	2,015,622(-)	1B	1C
		cagaatgtcctcgatcgtct
17	AATE002246	agaaagggaggctactacga	AatrE3_X:2,028,585	2,041,909(-)	1B	1C
		ggaaatcgtcgtagcggaaa
18	AATE017108	gatcgtgcaggcacagtcta	AatrE3_X:2,352,907	2,358,255(+)	1С	1С
		tgcgtagatcgaacaagtcg
19	AATE010870	ccaaatcttctcaatcgcccg	AatrE3_X:2,927,563	2,928,974(+)	1С	1С
		cgtcaagtcgtcctcggaat
20	AATE012020	acattctgcatctcgcacag	AatrE3_X:4,602,182	4,608,814(-)	2A	2A
		catcacgtcggggaagtagt
21	AATE015765	cccgaaaaaccatagcccga	AatrE3_X:5,527,302	5,531,343(-)	2B	2B
		aaccggttggaacgttggat
22	AATE000795	gctgaaaaccgatccgatgc	AatrE3_X:6,504,256	6,513,151(-)	2В	2В
		cacttacggcgatcctcctc
23	AATE004111	gtggaactacaacggccaga	AatrE3_X:8,538,061	8,542,551(-)	2C	2C
		agattgggcagaaaggcgaa
24	AATE001403	gactttgccacactgctgaa	AatrE3_X:8,751,285	8,754,177(-)	2C	2C
		tcctccattcgcatatcctc
25	AATE018270	gcacggggtcttcaacagta	AatrE3_X:9,855,878	9,857,040(+)	3B	3B
		agccggtgagaaacatcagg
26	AATE017493	cggttcgcttcatagcttgc	AatrE3_X:10,389,518	10,398,371(+)	3B	3B
		ccgtgctccgtaactgtctt
27	AATE008369	ggtttctccagcccgtactc	AatrE3_X:11,111,502	11,114,625(+)	3B	3B
		gatggtgctgcaggtggtag
28	AATE021170	atccaggcgatcattagccg	AatrE3_X:11,446,721	11,457,749(+)	3C	3C
		cctccgctatcggtttaccc
29	AATE018218	gttcccggacgaacagttta	AatrE3_X:11,958,281	11,959,687(-)	3C	4A
		cagcttgaagtggtggatga
30	AATE002004	atgtcctccctgatacgag	AatrE3_X:12,042,801	12,043,277(-)	3C	4A
		taacgtggcattacccattg
31	AATE005108	aagtgtgtcggtcacgagtc	AatrE3_X:12,069,346	12,075,734(+)	3C	Multiple
		ggacggcacgatctaagagg
32	AATE002819	cgcagcttaacatctcgtc	AatrE3_X:12,312,468	12,315,265(-)	3C	4A
		ccattggaagccattggtag
33	AATE000407	gtcatctcgcacatactgtt	AatrE3_X:12,347,972	12,350,706(-)	3C	4A
		tatcactaaggtaggcggtt
34	AATE002183	catcagcgtgttctcgttac	AatrE3_X:12,360,652	12,374,345(-)	3C	1C
		cagtagcgactccttgagac
35	AATE005101	ctgcctagagacgatccg	AatrE3_X:12,383,120	12,391,835(+)	3C	1C
		gctagcgttcacaacatcc
36	AATE005236	cggggcaacatcctattggt	AatrE3_X:12,437,092	12,444,184(-)	3C	3C
		ttccacaactgatgggctcc
37	AATE016801	cgctcagaagctcgatccat	AatrE3_X:13,084,169	13,097,940(+)	3C	3C
		tattctgccgatccagcgac
38	AATE009941	cgctgttccgtgattttctac	AatrE3_X:13,261,242	13,265,420(+)	4A	1C
		cttcttcccaccgttcgag
39	AATE016644	gctgttcaacctgatcgac	AatrE3_X:13,405,667	13,414,963(+)	4A	1C
		gaagtgcttataggagtcgtg
40	AATE010434	taagttgcacccgtgacctc	AatrE3_X:13,484,949	13,487,325(+)	4A	1C
		tcctggcgggagataagaca
41	AATE003509	catatcgccgagcatcac	AatrE3_X:13,604,821	13,616,218(-)	4A	1B
		ccgacttgaccgtttctatg
42	AATE015407	gtacaacctggacgtgtttg	AatrE3_X:14,122,043	14,125,830(+)	4A	1B
		gcattcgttgtggaagaagt
43	AATE011319	cctggtgcaatggtctact	AatrE3_X:14,267,272	14,271,819(+)	4A	1B
		tttgatccatggacgacgg
44	AATE004133	cttctatcaactcgactgcg	AatrE3_X:14,442,250	14,444,588(-)	4A	1B
		tacttcgggaaagagctagg
45	AATE004183	agaaatacaagagtgcccg	AatrE3_X:14,480,893	14,510,197(+)	4A	1B
		ggatgagcgagaggaaaaa
46	AATE009858	gcaccgcgcaagaaga	AatrE3_X:14,520,988	14,521,746(+)	4A	4B
		gcacgaagctgcggaa
47	AATE009010	agctacaccagggaacttgc	AatrE3_X:14,525,064	14,530,105(-)	4A	4B
		accgttgtgatttctccgct
48	AATE021145	gtgaagaaccagacgcttac	AatrE3_X:14,584,043	14,588,240(-)	4A	4B
		aggaagtacggatagttcgg
49	AATE007306	ccatgtcgttgtcgattagg	AatrE3_X:14,680,861	14,684,961(+)	4A	4B
		tcgttcgtgtactgctctat
50	AATE005256	gactacgtgatacagatcgc	AatrE3_X:14,795,318	14,811,135(-)	4A	4B
		tggtccttgcggtagtag
51	AATE018661	gcgaggagctgatacagacc	AatrE3_X:15,491,805	15,495,758(-)	4A	4B
		ttcttcttgcgctccttgat
52	AATE010210	tgaccaactaccgactgtgc	AatrE3_X:15,918,625	15,921,507(-)	4B	4B
		gtaaggcctcaacgcttcct
53	AATE016157	gtgcaccaagcgagtagtct	AatrE3_X:16,324,241	16,326,290(-)	4B	4B
		ggtaagttccgggcgattga
