# Supplementary material for: Two Nested Inversions in the X Chromosome Differentiate the Dominant Malaria Vectors in Europe, Anopheles atroparvus and Anopheles messeae
Source: Insects. 2024 Apr 26;15(5):312. doi: 10.3390/insects15050312 (PMC11122324; doi:10.3390/insects15050312)
Supplement: Supplementary file 1 [file insects-15-00312-s001.zip › Table S2 - List of SB2 and SB4 genes.xlsx]

## Sheet: Table S2
Table S2: List of genes located in SB2 and SB4 of the An. atroparvus X chromosome.
	Genomic location	Synthetic block
AATE011784	AatrE3_X:1,463,880..1,465,754(+)	SB2
AATE016042	AatrE3_X:1,465,925..1,468,608(-)	SB2
AATE021760	AatrE3_X:1,472,850..1,473,779(-)	SB2
AATE002683	AatrE3_X:1,474,565..1,477,429(-)	SB2
AATE009927	AatrE3_X:1,503,333..1,512,052(+)	SB2
AATE012122	AatrE3_X:1,514,581..1,519,283(-)	SB2
AATE000652	AatrE3_X:1,545,382..1,548,414(+)	SB2
AATE009073	AatrE3_X:1,564,139..1,566,618(+)	SB2
AATE004987	AatrE3_X:1,611,748..1,614,635(-)	SB2
AATE001529	AatrE3_X:1,615,140..1,622,594(+)	SB2
AATE004842	AatrE3_X:1,627,543..1,628,535(+)	SB2
AATE013780	AatrE3_X:1,629,871..1,633,254(+)	SB2
AATE009719	AatrE3_X:1,633,833..1,641,665(-)	SB2
AATE015831	AatrE3_X:1,645,767..1,648,236(+)	SB2
AATE021644	AatrE3_X:1,648,542..1,648,635(-)	SB2
AATE014682	AatrE3_X:1,659,219..1,675,104(+)	SB2
AATE016581	AatrE3_X:1,680,105..1,683,640(+)	SB2
AATE018003	AatrE3_X:1,691,693..1,727,270(-)	SB2
AATE012318	AatrE3_X:1,753,777..1,766,759(+)	SB2
AATE018677	AatrE3_X:1,810,742..1,812,803(-)	SB2
AATE017047	AatrE3_X:1,814,119..1,815,996(-)	SB2
AATE021789	AatrE3_X:1,817,146..1,819,035(+)	SB2
AATE021787	AatrE3_X:1,820,889..1,823,163(+)	SB2
AATE021788	AatrE3_X:1,823,484..1,825,376(+)	SB2
AATE019030	AatrE3_X:1,826,165..1,841,969(-)	SB2
AATE005501	AatrE3_X:1,843,037..1,845,196(-)	SB2
AATE015891	AatrE3_X:1,846,526..1,849,447(-)	SB2
AATE020070	AatrE3_X:1,849,794..1,851,371(+)	SB2
AATE006938	AatrE3_X:1,851,867..1,854,020(-)	SB2
AATE015925	AatrE3_X:1,869,140..1,893,058(+)	SB2
AATE012984	AatrE3_X:1,895,442..1,904,561(-)	SB2
AATE005672	AatrE3_X:1,906,229..1,910,536(-)	SB2
AATE019392	AatrE3_X:1,912,453..1,934,791(-)	SB2
AATE018338	AatrE3_X:1,940,446..1,952,661(-)	SB2
AATE021053	AatrE3_X:1,955,552..1,959,654(-)	SB2
AATE017741	AatrE3_X:1,960,425..1,963,110(+)	SB2
AATE011973	AatrE3_X:1,962,558..1,967,129(-)	SB2
AATE015772	AatrE3_X:1,973,121..1,976,096(-)	SB2
AATE016081	AatrE3_X:1,978,577..1,981,869(+)	SB2
AATE020982	AatrE3_X:1,983,088..1,985,780(+)	SB2
AATE021908	AatrE3_X:1,985,897..1,986,441(-)	SB2
AATE016478	AatrE3_X:1,988,001..1,992,840(-)	SB2
AATE001433	AatrE3_X:12,353,042..12,358,107(-)	SB4
AATE020008	AatrE3_X:12,358,778..12,359,961(+)	SB4
AATE002183	AatrE3_X:12,360,652..12,374,345(-)	SB4
AATE000678	AatrE3_X:12,364,325..12,367,031(+)	SB4
AATE019153	AatrE3_X:12,375,620..12,379,050(-)	SB4
AATE005101	AatrE3_X:12,383,120..12,391,835(+)	SB4
AATE005365	AatrE3_X:12,397,761..12,411,953(-)	SB4
AATE005781	AatrE3_X:12,411,178..12,413,103(+)	SB4
AATE002626	AatrE3_X:12,412,989..12,435,247(-)	SB4
AATE008232	AatrE3_X:12,433,919..12,434,738(+)	SB4
AATE005236	AatrE3_X:12,437,092..12,444,184(-)	SB4
AATE017375	AatrE3_X:12,478,485..12,483,366(+)	SB4
AATE004724	AatrE3_X:12,480,560..12,486,080(-)	SB4
AATE001041	AatrE3_X:12,491,927..12,511,697(+)	SB4
AATE005363	AatrE3_X:12,592,015..12,605,932(+)	SB4
AATE013806	AatrE3_X:12,608,583..12,614,410(-)	SB4
AATE002677	AatrE3_X:12,615,601..12,617,741(-)	SB4
AATE003077	AatrE3_X:12,618,483..12,620,781(+)	SB4
AATE000200	AatrE3_X:12,620,989..12,627,107(-)	SB4
AATE019686	AatrE3_X:12,630,490..12,642,846(-)	SB4
AATE013897	AatrE3_X:12,643,735..12,645,705(+)	SB4
AATE008154	AatrE3_X:12,659,008..12,661,549(-)	SB4
AATE019759	AatrE3_X:12,686,204..12,690,026(-)	SB4
AATE004103	AatrE3_X:12,700,577..12,710,301(-)	SB4
AATE013245	AatrE3_X:12,700,619..12,713,064(+)	SB4
AATE013011	AatrE3_X:12,812,115..12,826,359(+)	SB4
AATE009223	AatrE3_X:12,897,683..12,903,938(-)	SB4
AATE005921	AatrE3_X:12,906,012..12,908,591(+)	SB4
AATE017566	AatrE3_X:12,910,623..12,915,926(+)	SB4
AATE016721	AatrE3_X:12,915,232..12,916,094(-)	SB4
AATE014811	AatrE3_X:12,918,387..12,920,958(+)	SB4
AATE008512	AatrE3_X:12,923,558..12,933,754(+)	SB4
AATE002877	AatrE3_X:12,935,930..12,947,964(-)	SB4
AATE017610	AatrE3_X:12,960,728..12,963,063(-)	SB4
AATE009101	AatrE3_X:12,963,128..12,965,444(-)	SB4
AATE003727	AatrE3_X:12,969,104..12,977,995(-)	SB4
AATE000070	AatrE3_X:12,981,097..12,986,193(+)	SB4
AATE016801	AatrE3_X:13,084,169..13,097,940(+)	SB4
AATE005830	AatrE3_X:13,088,518..13,125,187(-)	SB4
AATE020937	AatrE3_X:13,164,492..13,186,382(+)	SB4
AATE000843	AatrE3_X:13,184,803..13,192,089(-)	SB4
AATE021907	AatrE3_X:13,195,253..13,195,798(+)	SB4
AATE016299	AatrE3_X:13,197,018..13,197,785(-)	SB4
AATE016515	AatrE3_X:13,199,973..13,200,332(+)	SB4
AATE010211	AatrE3_X:13,200,765..13,201,310(+)	SB4
AATE011866	AatrE3_X:13,201,742..13,202,002(+)	SB4
AATE015616	AatrE3_X:13,202,361..13,203,525(+)	SB4
AATE021906	AatrE3_X:13,206,371..13,206,931(+)	SB4
AATE011475	AatrE3_X:13,207,333..13,210,054(-)	SB4
AATE018992	AatrE3_X:13,213,827..13,228,009(-)	SB4
AATE018068	AatrE3_X:13,215,380..13,228,596(+)	SB4
AATE017321	AatrE3_X:13,228,772..13,229,402(-)	SB4
AATE019515	AatrE3_X:13,234,111..13,234,674(-)	SB4
AATE005475	AatrE3_X:13,236,449..13,246,292(-)	SB4
AATE009941	AatrE3_X:13,261,242..13,265,420(+)	SB4
AATE006348	AatrE3_X:13,284,754..13,306,486(+)	SB4
AATE020065	AatrE3_X:13,306,694..13,308,388(+)	SB4
AATE012954	AatrE3_X:13,308,330..13,310,905(-)	SB4
AATE006413	AatrE3_X:13,311,513..13,315,305(+)	SB4
AATE006690	AatrE3_X:13,323,709..13,330,716(+)	SB4
AATE013006	AatrE3_X:13,347,892..13,371,870(+)	SB4
AATE010035	AatrE3_X:13,355,809..13,359,142(-)	SB4
AATE016644	AatrE3_X:13,405,667..13,414,963(+)	SB4
AATE002187	AatrE3_X:13,418,114..13,418,503(+)	SB4
AATE006682	AatrE3_X:13,464,003..13,469,437(+)	SB4
AATE000800	AatrE3_X:13,468,855..13,470,333(-)	SB4
AATE010434	AatrE3_X:13,484,949..13,487,325(+)	SB4
AATE017083	AatrE3_X:13,496,211..13,499,219(-)	SB4
AATE011127	AatrE3_X:13,505,150..13,520,054(+)	SB4
AATE014580	AatrE3_X:13,514,620..13,518,100(-)	SB4
AATE003509	AatrE3_X:13,604,821..13,616,218(-)	SB4
AATE002274	AatrE3_X:13,617,373..13,624,233(+)	SB4
AATE006610	AatrE3_X:13,624,281..13,627,251(-)	SB4
AATE008201	AatrE3_X:13,646,167..13,648,685(+)	SB4
AATE005858	AatrE3_X:13,657,552..13,675,284(+)	SB4
AATE005566	AatrE3_X:13,676,017..13,678,857(+)	SB4
AATE009138	AatrE3_X:13,683,084..13,693,392(+)	SB4
AATE016320	AatrE3_X:13,694,094..13,698,956(-)	SB4
AATE009750	AatrE3_X:13,702,269..13,704,526(-)	SB4
AATE017737	AatrE3_X:13,705,602..13,710,142(-)	SB4
AATE014708	AatrE3_X:13,706,738..13,713,069(+)	SB4
AATE018478	AatrE3_X:13,751,621..13,762,505(+)	SB4
AATE011579	AatrE3_X:13,758,995..13,759,754(-)	SB4
AATE005583	AatrE3_X:13,766,509..13,783,958(-)	SB4
AATE016143	AatrE3_X:13,783,654..13,784,103(+)	SB4
AATE007344	AatrE3_X:13,794,481..13,820,422(+)	SB4
AATE006637	AatrE3_X:13,824,654..13,857,667(+)	SB4
AATE019641	AatrE3_X:13,876,857..13,878,696(-)	SB4
AATE006230	AatrE3_X:13,883,783..13,888,741(-)	SB4
AATE007017	AatrE3_X:13,890,561..13,907,120(-)	SB4
AATE004025	AatrE3_X:13,907,883..13,910,722(+)	SB4
AATE001024	AatrE3_X:13,912,430..13,913,810(+)	SB4
AATE015443	AatrE3_X:13,913,850..13,915,679(-)	SB4
AATE011758	AatrE3_X:13,919,080..13,924,135(-)	SB4
AATE008203	AatrE3_X:13,943,485..13,945,980(+)	SB4
AATE007183	AatrE3_X:13,965,562..13,971,729(-)	SB4
AATE000079	AatrE3_X:13,968,734..13,981,086(+)	SB4
AATE015701	AatrE3_X:13,978,149..13,987,122(-)	SB4
AATE011645	AatrE3_X:13,984,631..14,001,837(+)	SB4
AATE004619	AatrE3_X:13,988,191..13,993,511(-)	SB4
AATE010954	AatrE3_X:14,002,072..14,010,243(-)	SB4
AATE020361	AatrE3_X:14,012,289..14,014,898(+)	SB4
AATE005905	AatrE3_X:14,015,143..14,016,838(+)	SB4
AATE005125	AatrE3_X:14,024,402..14,029,225(-)	SB4
AATE017443	AatrE3_X:14,036,395..14,051,783(-)	SB4
AATE013033	AatrE3_X:14,055,238..14,057,199(-)	SB4
AATE020619	AatrE3_X:14,057,239..14,060,235(+)	SB4
AATE018926	AatrE3_X:14,059,801..14,062,736(-)	SB4
AATE010309	AatrE3_X:14,066,032..14,068,197(-)	SB4
AATE005959	AatrE3_X:14,091,129..14,097,716(+)	SB4
AATE014473	AatrE3_X:14,098,329..14,100,804(-)	SB4
AATE010873	AatrE3_X:14,102,745..14,103,861(+)	SB4
AATE011937	AatrE3_X:14,106,874..14,112,235(+)	SB4
AATE010700	AatrE3_X:14,110,198..14,111,670(-)	SB4
AATE015238	AatrE3_X:14,117,973..14,121,729(-)	SB4
AATE015407	AatrE3_X:14,122,043..14,125,830(+)	SB4
AATE011319	AatrE3_X:14,267,272..14,271,819(+)	SB4
AATE014242	AatrE3_X:14,286,644..14,287,937(+)	SB4
AATE012218	AatrE3_X:14,324,707..14,325,564(+)	SB4
AATE000531	AatrE3_X:14,325,518..14,327,303(-)	SB4
AATE000788	AatrE3_X:14,329,965..14,332,799(+)	SB4
AATE005324	AatrE3_X:14,337,274..14,338,602(-)	SB4
AATE003583	AatrE3_X:14,352,698..14,354,221(-)	SB4
AATE018948	AatrE3_X:14,369,425..14,376,838(-)	SB4
AATE009095	AatrE3_X:14,371,158..14,375,882(+)	SB4
AATE016267	AatrE3_X:14,378,387..14,382,049(-)	SB4
AATE015377	AatrE3_X:14,384,025..14,387,878(+)	SB4
AATE014439	AatrE3_X:14,384,840..14,391,010(-)	SB4
AATE014235	AatrE3_X:14,390,521..14,391,561(+)	SB4
AATE014415	AatrE3_X:14,391,133..14,392,615(-)	SB4
AATE014520	AatrE3_X:14,400,645..14,404,723(+)	SB4
AATE006774	AatrE3_X:14,404,834..14,407,769(-)	SB4
AATE019391	AatrE3_X:14,410,975..14,412,172(+)	SB4
AATE020341	AatrE3_X:14,414,429..14,425,952(+)	SB4
AATE014374	AatrE3_X:14,427,230..14,430,184(+)	SB4
AATE004957	AatrE3_X:14,430,073..14,434,755(-)	SB4
AATE004133	AatrE3_X:14,442,250..14,444,588(-)	SB4
AATE004183	AatrE3_X:14,480,893..14,510,197(+)	SB4
AATE012416	AatrE3_X:14,499,064..14,500,570(-)	SB4
