# Supplementary material for: Two Nested Inversions in the X Chromosome Differentiate the Dominant Malaria Vectors in Europe, Anopheles atroparvus and Anopheles messeae
Source: Insects. 2024 Apr 26;15(5):312. doi: 10.3390/insects15050312 (PMC11122324; doi:10.3390/insects15050312)
Supplement: Supplementary file 1 [file insects-15-00312-s001.zip › Table S3 - The coordinates of the BR-flanking gene markers in the An. atroparvus genome assembly..xlsx]

## Sheet: Table S3
Table S3: The coordinates of the BR-flanking gene markers in the An. atroparvus genome assembly.
BR	“Left” marker coordinates				“Right” marker coordinates				Length of BR, bp
	Start	Stop	Gene	Exon*	Start	Stop	Gene	Exon*
I	1 458 040	1 458 895	AATE008844	7	1 466 290	1 466 970	AATE016042	2024-03-02	7.395
II	1 992 544	1 992 840	AATE016478	1	2 000 315	2 000 825	AATE020848	2024-02-01	7.475
III	12 347 972	12 348 540	AATE000407	2024-05-04	12 360 692	12 362 480	AATE002183	8	12.152
IV	14 508 845	14 509 445	AATE004183	10	14 520 988	14 521 746	AATE009858	1	11.543
*Exon index number for which the probe was designed.
