# Supplementary material for: Two Nested Inversions in the X Chromosome Differentiate the Dominant Malaria Vectors in Europe, Anopheles atroparvus and Anopheles messeae
Source: Insects. 2024 Apr 26;15(5):312. doi: 10.3390/insects15050312 (PMC11122324; doi:10.3390/insects15050312)
Supplement: Supplementary file 1 [file insects-15-00312-s001.zip › Table S4 - Enriched GO Biological Process term.xlsx]

## Sheet: GO biol proc
Table S4: Enriched GO Biological Process terms in SB2 and SB4 of the An. atroparvus X chromosome.
	Name	Bgd count	Result count	Result gene list	Pct of bgd	Fold enrichment	Odds ratio	P-value	Benjamini	Bonferroni
GO:0051588	regulation of neurotransmitter transport	1	1	AATE016581,	100	75.67	inf	0.0132144391919	0.175059334099	1.0
GO:0048167	regulation of synaptic plasticity	1	1	AATE016581,	100	75.67	inf	0.0132144391919	0.175059334099	1.0
GO:0060179	male mating behavior	1	1	AATE016644,	100	75.67	inf	0.0132144391919	0.175059334099	1.0
GO:0007617	mating behavior	1	1	AATE016644,	100	75.67	inf	0.0132144391919	0.175059334099	1.0
GO:0050806	positive regulation of synaptic transmission	1	1	AATE016581,	100	75.67	inf	0.0132144391919	0.175059334099	1.0
GO:0042438	melanin biosynthetic process	1	1	AATE016644,	100	75.67	inf	0.0132144391919	0.175059334099	1.0
GO:0034477	U6 snRNA 3'-end processing	1	1	AATE012218,	100	75.67	inf	0.0132144391919	0.175059334099	1.0
GO:0060291	long-term synaptic potentiation	1	1	AATE016581,	100	75.67	inf	0.0132144391919	0.175059334099	1.0
GO:0007610	behavior	1	1	AATE016644,	100	75.67	inf	0.0132144391919	0.175059334099	1.0
GO:0019098	reproductive behavior	1	1	AATE016644,	100	75.67	inf	0.0132144391919	0.175059334099	1.0
GO:0046928	regulation of neurotransmitter secretion	1	1	AATE016581,	100	75.67	inf	0.0132144391919	0.175059334099	1.0
GO:0007618	mating	1	1	AATE016644,	100	75.67	inf	0.0132144391919	0.175059334099	1.0
GO:0006582	melanin metabolic process	1	1	AATE016644,	100	75.67	inf	0.0132144391919	0.175059334099	1.0
GO:0019731	antibacterial humoral response	3	2	AATE021906,AATE021908,	66.7	50.45	151.8	0.000515156432858	0.0254239666039	0.177728969336
GO:0019730	antimicrobial humoral response	3	2	AATE021906,AATE021908,	66.7	50.45	151.8	0.000515156432858	0.0254239666039	0.177728969336
GO:0006959	humoral immune response	3	2	AATE021906,AATE021908,	66.7	50.45	151.8	0.000515156432858	0.0254239666039	0.177728969336
GO:0006266	DNA ligation	2	1	AATE013780,	50	37.84	75.28	0.0262556580571	0.184861265912	1.0
GO:0099177	regulation of trans-synaptic signaling	2	1	AATE016581,	50	37.84	75.28	0.0262556580571	0.184861265912	1.0
GO:0006491	N-glycan processing	2	1	AATE013897,	50	37.84	75.28	0.0262556580571	0.184861265912	1.0
GO:0051781	positive regulation of cell division	2	1	AATE005672,	50	37.84	75.28	0.0262556580571	0.184861265912	1.0
GO:0051103	DNA ligation involved in DNA repair	2	1	AATE013780,	50	37.84	75.28	0.0262556580571	0.184861265912	1.0
GO:0050804	modulation of chemical synaptic transmission	2	1	AATE016581,	50	37.84	75.28	0.0262556580571	0.184861265912	1.0
GO:0046349	amino sugar biosynthetic process	2	1	AATE002677,	50	37.84	75.28	0.0262556580571	0.184861265912	1.0
GO:0036092	phosphatidylinositol-3-phosphate biosynthetic process	2	1	AATE012984,	50	37.84	75.28	0.0262556580571	0.184861265912	1.0
GO:0010138	pyrimidine ribonucleotide salvage	2	1	AATE011973,	50	37.84	75.28	0.0262556580571	0.184861265912	1.0
GO:0019748	secondary metabolic process	2	1	AATE016644,	50	37.84	75.28	0.0262556580571	0.184861265912	1.0
GO:0032262	pyrimidine nucleotide salvage	2	1	AATE011973,	50	37.84	75.28	0.0262556580571	0.184861265912	1.0
GO:0006048	UDP-N-acetylglucosamine biosynthetic process	2	1	AATE002677,	50	37.84	75.28	0.0262556580571	0.184861265912	1.0
GO:0006047	UDP-N-acetylglucosamine metabolic process	2	1	AATE002677,	50	37.84	75.28	0.0262556580571	0.184861265912	1.0
GO:0051046	regulation of secretion	2	1	AATE016581,	50	37.84	75.28	0.0262556580571	0.184861265912	1.0
GO:0044550	secondary metabolite biosynthetic process	2	1	AATE016644,	50	37.84	75.28	0.0262556580571	0.184861265912	1.0
GO:0044206	UMP salvage	2	1	AATE011973,	50	37.84	75.28	0.0262556580571	0.184861265912	1.0
GO:0008655	pyrimidine-containing compound salvage	2	1	AATE011973,	50	37.84	75.28	0.0262556580571	0.184861265912	1.0
GO:0032467	positive regulation of cytokinesis	2	1	AATE005672,	50	37.84	75.28	0.0262556580571	0.184861265912	1.0
GO:1903530	regulation of secretion by cell	2	1	AATE016581,	50	37.84	75.28	0.0262556580571	0.184861265912	1.0
GO:0042742	defense response to bacterium	5	2	AATE021906,AATE021908,	40	30.27	50.59	0.00168759199654	0.0447860952928	0.582219238806
GO:0009617	response to bacterium	5	2	AATE021906,AATE021908,	40	30.27	50.59	0.00168759199654	0.0447860952928	0.582219238806
GO:0046189	phenol-containing compound biosynthetic process	3	1	AATE016644,	33.3	25.22	37.64	0.03912590887	0.235298470686	1.0
GO:0006275	regulation of DNA replication	3	1	AATE005324,	33.3	25.22	37.64	0.03912590887	0.235298470686	1.0
GO:0034472	snRNA 3'-end processing	3	1	AATE012218,	33.3	25.22	37.64	0.03912590887	0.235298470686	1.0
GO:0031929	TOR signaling	3	1	AATE011784,	33.3	25.22	37.64	0.03912590887	0.235298470686	1.0
GO:0043628	ncRNA 3'-end processing	3	1	AATE012218,	33.3	25.22	37.64	0.03912590887	0.235298470686	1.0
GO:0018958	phenol-containing compound metabolic process	3	1	AATE016644,	33.3	25.22	37.64	0.03912590887	0.235298470686	1.0
GO:0043173	nucleotide salvage	3	1	AATE011973,	33.3	25.22	37.64	0.03912590887	0.235298470686	1.0
GO:0090068	positive regulation of cell cycle process	3	1	AATE005672,	33.3	25.22	37.64	0.03912590887	0.235298470686	1.0
GO:0006955	immune response	13	3	AATE019391,AATE021906,AATE021908,	23.1	17.46	22.94	0.000584636062021	0.0254239666039	0.201699441397
GO:0002376	immune system process	14	3	AATE019391,AATE021906,AATE021908,	21.4	16.22	20.85	0.000736926568229	0.0254239666039	0.254239666039
GO:0098542	defense response to other organism	14	3	AATE019391,AATE021906,AATE021908,	21.4	16.22	20.85	0.000736926568229	0.0254239666039	0.254239666039
GO:0051707	response to other organism	14	3	AATE019391,AATE021906,AATE021908,	21.4	16.22	20.85	0.000736926568229	0.0254239666039	0.254239666039
GO:0043207	response to external biotic stimulus	14	3	AATE019391,AATE021906,AATE021908,	21.4	16.22	20.85	0.000736926568229	0.0254239666039	0.254239666039
GO:0044419	biological process involved in interspecies interaction between organisms	14	3	AATE019391,AATE021906,AATE021908,	21.4	16.22	20.85	0.000736926568229	0.0254239666039	0.254239666039
GO:0009607	response to biotic stimulus	14	3	AATE019391,AATE021906,AATE021908,	21.4	16.22	20.85	0.000736926568229	0.0254239666039	0.254239666039
GO:0006952	defense response	18	3	AATE019391,AATE021906,AATE021908,	16.7	12.61	15.28	0.00158946440464	0.0447860952928	0.5483652196
GO:0035235	ionotropic glutamate receptor signaling pathway	14	2	AATE017047,AATE021788,	14.3	10.81	12.63	0.0142077140718	0.175059334099	1.0
GO:0007215	glutamate receptor signaling pathway	14	2	AATE017047,AATE021788,	14.3	10.81	12.63	0.0142077140718	0.175059334099	1.0
GO:0007015	actin filament organization	18	2	AATE005959,AATE008512,	11.1	8.41	9.47	0.0230813354488	0.184861265912	1.0
GO:0097435	supramolecular fiber organization	24	2	AATE005959,AATE008512,	8.3	6.31	6.88	0.0395574240573	0.235298470686	1.0
GO:0009605	response to external stimulus	42	3	AATE019391,AATE021906,AATE021908,	7.1	5.41	5.86	0.0177739814141	0.184861265912	1.0
