# Supplementary material for: Two Nested Inversions in the X Chromosome Differentiate the Dominant Malaria Vectors in Europe, Anopheles atroparvus and Anopheles messeae
Source: Insects. 2024 Apr 26;15(5):312. doi: 10.3390/insects15050312 (PMC11122324; doi:10.3390/insects15050312)
Supplement: Supplementary file 1 [file insects-15-00312-s001.zip › Table S5 - Enriched GO Molecular Function terms.xlsx]

## Sheet: GO mol fun
Table S5: Enriched GO Molecular Function terms in SB2 and SB4 of the An. atroparvus X chromosome.
	Name	Bgd count	Result count	Result gene list	Pct of bgd	Fold enrichment	Odds ratio	P-value	Benjamini	Bonferroni
GO:0004850	uridine phosphorylase activity	1	1	AATE011973,	100	75.67	inf	0.0132144391919	0.206558304582	1.0
GO:0016316	phosphatidylinositol-3,4-bisphosphate 4-phosphatase activity	1	1	AATE012984,	100	75.67	inf	0.0132144391919	0.206558304582	1.0
GO:0004343	glucosamine 6-phosphate N-acetyltransferase activity	1	1	AATE002677,	100	75.67	inf	0.0132144391919	0.206558304582	1.0
GO:1990838	poly(U)-specific exoribonuclease activity, producing 3' uridine cyclic phosphate ends	1	1	AATE012218,	100	75.67	inf	0.0132144391919	0.206558304582	1.0
GO:0106017	phosphatidylinositol-3,4-bisphosphate phosphatase activity	1	1	AATE012984,	100	75.67	inf	0.0132144391919	0.206558304582	1.0
GO:0030151	molybdenum ion binding	4	2	AATE012954,AATE020065,	50	37.84	75.89	0.00102139090867	0.193042881738	0.193042881738
GO:0042834	peptidoglycan binding	2	1	AATE019391,	50	37.84	75.28	0.0262556580571	0.27388136209	1.0
GO:0034596	phosphatidylinositol phosphate 4-phosphatase activity	2	1	AATE012984,	50	37.84	75.28	0.0262556580571	0.27388136209	1.0
GO:0003910	DNA ligase (ATP) activity	2	1	AATE013780,	50	37.84	75.28	0.0262556580571	0.27388136209	1.0
GO:0003909	DNA ligase activity	2	1	AATE013780,	50	37.84	75.28	0.0262556580571	0.27388136209	1.0
GO:0070006	metalloaminopeptidase activity	6	2	AATE012122,AATE016042,	33.3	25.22	37.94	0.00250951212832	0.206558304582	0.474297792253
GO:0036374	glutathione hydrolase activity	3	1	AATE005125,	33.3	25.22	37.64	0.03912590887	0.27388136209	1.0
GO:0034593	phosphatidylinositol bisphosphate phosphatase activity	3	1	AATE012984,	33.3	25.22	37.64	0.03912590887	0.27388136209	1.0
GO:0016802	trialkylsulfonium hydrolase activity	3	1	AATE006610,	33.3	25.22	37.64	0.03912590887	0.27388136209	1.0
GO:0004013	adenosylhomocysteinase activity	3	1	AATE006610,	33.3	25.22	37.64	0.03912590887	0.27388136209	1.0
GO:0004089	carbonate dehydratase activity	12	2	AATE012318,AATE020937,	16.7	12.61	15.17	0.0104835189655	0.206558304582	1.0
GO:0004970	ionotropic glutamate receptor activity	14	2	AATE017047,AATE021788,	14.3	10.81	12.63	0.0142077140718	0.206558304582	1.0
GO:0008066	glutamate receptor activity	14	2	AATE017047,AATE021788,	14.3	10.81	12.63	0.0142077140718	0.206558304582	1.0
GO:0004177	aminopeptidase activity	21	2	AATE012122,AATE016042,	9.5	7.21	7.97	0.0308777402912	0.27388136209	1.0
GO:0070279	vitamin B6 binding	33	3	AATE012954,AATE015238,AATE020065,	9.1	6.88	7.63	0.00920314978553	0.206558304582	1.0
GO:0030170	pyridoxal phosphate binding	33	3	AATE012954,AATE015238,AATE020065,	9.1	6.88	7.63	0.00920314978553	0.206558304582	1.0
GO:0022824	transmitter-gated ion channel activity	22	2	AATE017047,AATE021788,	9.1	6.88	7.57	0.0336768725705	0.27388136209	1.0
GO:0022835	transmitter-gated channel activity	22	2	AATE017047,AATE021788,	9.1	6.88	7.57	0.0336768725705	0.27388136209	1.0
GO:0030594	neurotransmitter receptor activity	23	2	AATE017047,AATE021788,	8.7	6.58	7.21	0.0365710862937	0.27388136209	1.0
GO:0036459	thiol-dependent ubiquitinyl hydrolase activity	25	2	AATE009719,AATE016081,	8	6.05	6.58	0.0426329888904	0.28777267501	1.0
GO:0008235	metalloexopeptidase activity	38	3	AATE012122,AATE015377,AATE016042,	7.9	5.97	6.54	0.013567346782	0.206558304582	1.0
GO:0016836	hydro-lyase activity	26	2	AATE012318,AATE020937,	7.7	5.82	6.31	0.0457949432043	0.296829739632	1.0
GO:0019842	vitamin binding	48	3	AATE012954,AATE015238,AATE020065,	6.3	4.73	5.08	0.0252985407956	0.27388136209	1.0
GO:0016829	lyase activity	87	4	AATE012318,AATE015238,AATE018478,AATE020937,	4.6	3.48	3.69	0.0278969977892	0.27388136209	1.0
