# Supplementary material for: Two Nested Inversions in the X Chromosome Differentiate the Dominant Malaria Vectors in Europe, Anopheles atroparvus and Anopheles messeae
Source: Insects. 2024 Apr 26;15(5):312. doi: 10.3390/insects15050312 (PMC11122324; doi:10.3390/insects15050312)
Supplement: Supplementary file 1 [file insects-15-00312-s001.zip › Table S6 - Enriched GO Cellular Component terms.xlsx]

## Sheet: GO cell comp
Table S6: Enriched GO Cellular Component terms in SB2 and SB4 of the An. atroparvus X chromosome.
	Name	Bgd count	Result count	Result gene list	Pct of bgd	Fold enrichment	Odds ratio	P-value	Benjamini	Bonferroni
GO:0031201	SNARE complex	1	1	AATE005905,	100	75.67	inf	0.0132144391919	0.150325860395	0.96465406101
GO:0005868	cytoplasmic dynein complex	1	1	AATE009138,	100	75.67	inf	0.0132144391919	0.150325860395	0.96465406101
GO:0031932	TORC2 complex	2	1	AATE011784,	50	37.84	75.28	0.0262556580571	0.150325860395	1.0
GO:0043292	contractile fiber	2	1	AATE014682,	50	37.84	75.28	0.0262556580571	0.150325860395	1.0
GO:0036379	myofilament	2	1	AATE014682,	50	37.84	75.28	0.0262556580571	0.150325860395	1.0
GO:0030016	myofibril	2	1	AATE014682,	50	37.84	75.28	0.0262556580571	0.150325860395	1.0
GO:0031931	TORC1 complex	2	1	AATE011784,	50	37.84	75.28	0.0262556580571	0.150325860395	1.0
GO:0030017	sarcomere	2	1	AATE014682,	50	37.84	75.28	0.0262556580571	0.150325860395	1.0
GO:0005865	striated muscle thin filament	2	1	AATE014682,	50	37.84	75.28	0.0262556580571	0.150325860395	1.0
GO:0005861	troponin complex	2	1	AATE014682,	50	37.84	75.28	0.0262556580571	0.150325860395	1.0
GO:0038201	TOR complex	3	1	AATE011784,	33.3	25.22	37.64	0.03912590887	0.150325860395	1.0
GO:0034707	chloride channel complex	3	1	AATE011937,	33.3	25.22	37.64	0.03912590887	0.150325860395	1.0
GO:0072487	MSL complex	3	1	AATE002626,	33.3	25.22	37.64	0.03912590887	0.150325860395	1.0
GO:0000123	histone acetyltransferase complex	21	2	AATE002626,AATE019759,	9.5	7.21	7.97	0.0308777402912	0.150325860395	1.0
GO:0031248	protein acetyltransferase complex	22	2	AATE002626,AATE019759,	9.1	6.88	7.57	0.0336768725705	0.150325860395	1.0
GO:1902493	acetyltransferase complex	22	2	AATE002626,AATE019759,	9.1	6.88	7.57	0.0336768725705	0.150325860395	1.0
GO:0099081	supramolecular polymer	45	3	AATE005672,AATE009138,AATE014682,	6.7	5.04	5.44	0.021353378483	0.150325860395	1.0
GO:0099512	supramolecular fiber	45	3	AATE005672,AATE009138,AATE014682,	6.7	5.04	5.44	0.021353378483	0.150325860395	1.0
GO:0099080	supramolecular complex	50	3	AATE005672,AATE009138,AATE014682,	6	4.54	4.86	0.0281317327327	0.150325860395	1.0
